# Supplementary material for: Double Rydberg anions, Rydberg radicals and micro-solvated cations with ammonium–water kernels
Source: Royal Society of Chemistry journal article supplement (doi:10.1039/d2cp02570a), 2022-01-01
Supplement: d2cp02570a1.pdf [file d2cp02570a1.pdf]

# **Double Rydberg Anions, Rydberg Radicals and Micro-solvated Cations with Ammonium-Water Kernels**

Ernest Opoku, Filip Pawłowski and Joseph Vincent Ortiz\*

Department of Chemistry and Biochemistry, Auburn University,  
Auburn, AL 36849-5312, United States

ezo0009@auburn.edu, filip@auburn.edu, ortiz@auburn.edu

## *Supporting Information*

**Table S1: 1a NH<sub>4</sub><sup>+</sup>(H<sub>2</sub>O) vertical electron attachment energies (VEAEs). Pole strengths are in parentheses. All energies are in eV.**

| Basis | KT    | D2            | D3            | OVGF-A <sup>a</sup> | OVGF-B <sup>a</sup>  | OVGF-C <sup>a</sup>  | P3            | P3+           |
|-------|-------|---------------|---------------|---------------------|----------------------|----------------------|---------------|---------------|
| aTZ   | 3.315 | 3.742 (0.988) | 3.721 (0.986) | 3.724 (0.987)       | <b>3.725 (0.986)</b> | 3.723 (0.986)        | 3.748 (0.986) | 3.747 (0.986) |
| daTZ  | 3.324 | 3.744(0.988)  | 3.722(0.987)  | 3.726 (0.987)       | 3.727 (0.987)        | <b>3.725 (0.987)</b> | 3.749 (0.986) | 3.748 (0.986) |
| taTZ  | 3.324 | 3.744 (0.988) | 3.722(0.987)  | 3.726 (0.987)       | 3.727 (0.987)        | <b>3.725 (0.987)</b> | 3.749 (0.986) | 3.748 (0.986) |
| qaTZ  | 3.324 | 3.744 (0.988) | 3.722(0.987)  | 3.725 (0.986)       | 3.726 (0.986)        | <b>3.724 (0.986)</b> | 3.749 (0.986) | 3.748 (0.986) |
| aQZ   | 3.318 | 3.751 (0.988) | 3.720 (0.986) | 3.725 (0.986)       | 3.725 (0.986)        | <b>3.723 (0.986)</b> | 3.753 (0.986) | 3.753 (0.986) |

<sup>a</sup>The numerically recommended OVGF version is in bold.

**Table S2: NH<sub>4</sub><sup>+</sup>(H<sub>2</sub>O)<sub>2</sub> vertical electron attachment energies (VEAEs). Pole strengths are in parentheses. All energies are in eV.**

| 2a NH <sub>4</sub> <sup>+</sup> (H <sub>2</sub> O) <sub>2</sub> | Basis | KT    | D2            | D3            | OVGF-A <sup>a</sup>  | OVGF-B <sup>a</sup>  | OVGF-C <sup>a</sup>  | P3            | P3+           |
|-----------------------------------------------------------------|-------|-------|---------------|---------------|----------------------|----------------------|----------------------|---------------|---------------|
|                                                                 | aTZ   | 2.814 | 3.216 (0.988) | 3.213 (0.987) | 3.214 (0.987)        | <b>3.218 (0.987)</b> | 3.214 (0.987)        | 3.223 (0.986) | 3.222 (0.986) |
|                                                                 | daTZ  | 2.836 | 3.220(0.989)  | 3.217 (0.987) | <b>3.218 (0.988)</b> | 3.221 (0.988)        | <b>3.218 (0.988)</b> | 3.226 (0.987) | 3.226 (0.987) |
|                                                                 | taTZ  | 2.836 | 3.220(0.989)  | 3.217 (0.987) | <b>3.218 (0.988)</b> | 3.222 (0.988)        | <b>3.218 (0.988)</b> | 3.226 (0.987) | 3.226 (0.987) |
|                                                                 | qaTZ  | 2.836 | 3.220(0.989)  | 3.217 (0.987) | 3.217 (0.987)        | 3.221 (0.987)        | <b>3.217 (0.987)</b> | 3.226 (0.987) | 3.226 (0.987) |
|                                                                 | aQZ   | 2.821 | 3.225 (0.988) | 3.213 (0.987) | 3.215 (0.987)        | 3.218 (0.987)        | <b>3.214 (0.987)</b> | 3.229 (0.986) | 3.229 (0.986) |
| 2b NH <sub>4</sub> <sup>+</sup> (H <sub>2</sub> O) <sub>2</sub> | Basis | KT    | D2            | D3            | OVGF-A <sup>a</sup>  | OVGF-B <sup>a</sup>  | OVGF-C <sup>a</sup>  | P3            | P3+           |
|                                                                 | aTZ   | 2.954 | 3.359 (0.988) | 3.346 (0.987) | 3.348 (0.987)        | 3.350 (0.987)        | <b>3.347 (0.987)</b> | 3.366 (0.986) | 3.366 (0.986) |
|                                                                 | daTZ  | 2.969 | 3.361(0.988)  | 3.348 (0.987) | <b>3.350 (0.987)</b> | 3.352 (0.987)        | <b>3.350 (0.987)</b> | 3.368 (0.986) | 3.367 (0.987) |
|                                                                 | taTZ  | 2.969 | 3.361(0.988)  | 3.348 (0.987) | 3.351 (0.987)        | 3.352 (0.987)        | <b>3.350 (0.988)</b> | 3.368 (0.986) | 3.367 (0.987) |
|                                                                 | qaTZ  | 2.969 | 3.361(0.988)  | 3.348 (0.987) | <b>3.350 (0.987)</b> | 3.352 (0.987)        | 3.349 (0.987)        | 3.368 (0.986) | 3.367 (0.987) |
|                                                                 | aQZ   | 2.959 | 3.368 (0.988) | 3.346 (0.987) | 3.349 (0.987)        | 3.350 (0.986)        | 3.348 (0.986)        | 3.372 (0.986) | 3.372 (0.986) |

<sup>a</sup>The numerically recommended OVGF version is in bold.

**Table S3:** NH<sub>4</sub><sup>-</sup> H<sub>2</sub>O isomers and their vertical electron detachment energies (VEDEs). Pole strengths are in parentheses. All energies are in eV.

| H(NH <sub>3</sub> )H <sub>2</sub> O                | KT    | D2            | D3            | OVGF-A <sup>a</sup> | OVGF-B <sup>a</sup>  | OVGF-C <sup>a</sup>  | P3            | P3+           |
|----------------------------------------------------|-------|---------------|---------------|---------------------|----------------------|----------------------|---------------|---------------|
| aTZ                                                | 2.512 | 1.958 (0.892) | 2.211 (0.903) | 2.093 (0.908)       | 2.243 (0.899)        | <b>2.225 (0.900)</b> | 1.977 (0.906) | 1.975 (0.90)  |
| daTZ                                               | 2.512 | 1.969 (0.893) | 2.220 (0.907) | 2.101 (0.910)       | 2.252 (0.902)        | <b>2.235 (0.904)</b> | 1.987 (0.909) | 1.985 (0.908) |
| taTZ                                               | 2.512 | 1.969 (0.893) | 2.221 (0.907) | 2.102 (0.910)       | 2.253 (0.902)        | <b>2.235 (0.904)</b> | 1.988 (0.909) | 1.986 (0.908) |
| qaTZ                                               | 2.512 | 1.970 (0.893) | 2.221 (0.907) | 2.102 (0.910)       | 2.253 (0.902)        | <b>2.235 (0.904)</b> | 1.988 (0.909) | 1.986 (0.908) |
| aQZ                                                | 2.514 | 2.001 (0.892) | 2.231 (0.905) | 2.117 (0.908)       | 2.258 (0.901)        | 2.241 (0.902)        | 2.023 (0.907) | 2.021 (0.906) |
| <hr/>                                              |       |               |               |                     |                      |                      |               |               |
| [NH <sub>4</sub> <sup>-</sup> ]H <sub>2</sub> O    |       |               |               |                     |                      |                      |               |               |
| aTZ                                                | 0.112 | 0.652 (0.933) | 0.553 (0.904) | 0.479 (0.872)       | 0.602 (0.898)        | <b>0.513 (0.883)</b> | 0.612 (0.915) | 0.616 (0.917) |
| daTZ                                               | 0.368 | 0.770 (0.877) | 0.608 (0.854) | 0.401 (0.673)       | 0.652 (0.851)        | <b>0.533 (0.810)</b> | 0.719 (0.851) | 0.723 (0.854) |
| taTZ                                               | 0.382 | 0.756 (0.854) | 0.613 (0.872) | 0.391 (0.646)       | 0.652 (0.863)        | <b>0.568 (0.892)</b> | 0.736 (0.875) | 0.738 (0.873) |
| qaTZ                                               | 0.382 | 0.756 (0.853) | 0.613 (0.874) | 0.391 (0.650)       | 0.652 (0.864)        | 0.569 (0.896)        | 0.737 (0.87)  | 0.739 (0.877) |
| aQZ                                                | 0.158 | 0.699 (0.929) | 0.572 (0.899) | 0.475 (0.860)       | 0.620 (0.894)        | 0.518 (0.870)        | 0.655 (0.908) | 0.659 (0.910) |
| <hr/>                                              |       |               |               |                     |                      |                      |               |               |
| 1a NH <sub>4</sub> <sup>-</sup> (H <sub>2</sub> O) |       |               |               |                     |                      |                      |               |               |
| aTZ                                                | 0.151 | 0.374 (0.930) | 0.303 (0.893) | 0.251 (0.861)       | 0.360 (0.886)        | <b>0.266 (0.863)</b> | 0.331 (0.909) | 0.334 (0.910) |
| daTZ                                               | 0.211 | 0.575 (0.872) | 0.422 (0.834) | 0.20887 (0.582)     | <b>0.476 (0.830)</b> | 0.311 (0.686)        | 0.511 (0.831) | 0.517 (0.835) |
| taTZ                                               | 0.244 | 0.554 (0.828) | 0.421 (0.848) | 0.206 (0.338)       | 0.467 (0.836)        | <b>0.365 (0.873)</b> | 0.528 (0.848) | 0.531 (0.846) |
| qaTZ                                               | 0.244 | 0.553 (0.824) | 0.424 (0.859) | 0.209 (0.339)       | 0.469 (0.845)        | <b>0.373 (0.902)</b> | 0.534 (0.869) | 0.536 (0.865) |
| aQZ                                                | 0.088 | 0.434 (0.926) | 0.336 (0.889) | 0.260 (0.850)       | 0.392 (0.883)        | <b>0.282 (0.847)</b> | 0.387 (0.902) | 0.391 (0.904) |

<sup>a</sup>The numerically recommended OVGF version is in bold.

**Table S4:**  $\text{NH}_4^+(\text{H}_2\text{O})_n$  isomers and their relative energies are in eV. Calculations were executed with the **aug-cc-pVTZ** basis set.

| <i>n</i> | Isomer                                          | $\Delta E^{MP2}$ | $\Delta E_{ZPE}^{MP2}$ | $\Delta E^{CCSD}$ | $\Delta E^{CCSD(T)}$ | $\Delta E_{ZPE-MP2}^{CCSD(T)}$ |
|----------|-------------------------------------------------|------------------|------------------------|-------------------|----------------------|--------------------------------|
| 1        | <b>1a</b> $\text{NH}_4^+(\text{H}_2\text{O})$   | -                | -                      | -                 | -                    | -                              |
| 2        | <b>2a</b> $\text{NH}_4^+(\text{H}_2\text{O})_2$ | 0.000            | 0.000                  | 0.000             | 0.000                | 0.000                          |
|          | <b>2b</b> $\text{NH}_4^+(\text{H}_2\text{O})_2$ | 0.111            | 0.124                  | 0.129             | 0.118                | 0.130                          |
| 3        | <b>3a</b> $\text{NH}_4^+(\text{H}_2\text{O})_3$ | 0.000            | 0.054                  | 0.006             | 0.000                | 0.047                          |
|          | <b>3b</b> $\text{NH}_4^+(\text{H}_2\text{O})_3$ | 0.015            | 0.000                  | 0.000             | 0.022                | 0.000                          |
|          | <b>3c</b> $\text{NH}_4^+(\text{H}_2\text{O})_3$ | 0.085            | 0.091                  | 0.085             | 0.097                | 0.096                          |
| 4        | <b>4a</b> $\text{NH}_4^+(\text{H}_2\text{O})_4$ | 0.002            | 0.078                  | 0.067             | 0.050                | 0.088                          |
|          | <b>4b</b> $\text{NH}_4^+(\text{H}_2\text{O})_4$ | 0.000            | 0.013                  | 0.000             | 0.000                | 0.014                          |
|          | <b>4c</b> $\text{NH}_4^+(\text{H}_2\text{O})_4$ | 0.085            | 0.127                  | 0.103             | 0.090                | 0.133                          |
|          | <b>4d</b> $\text{NH}_4^+(\text{H}_2\text{O})_4$ | 1.854            | 0.061                  | 0.087             | 0.097                | 0.067                          |
|          | <b>4e</b> $\text{NH}_4^+(\text{H}_2\text{O})_4$ | 0.061            | 0.000                  | 0.040             | 0.060                | 0.000                          |

**Table S5:**  $\text{NH}_4^+(\text{H}_2\text{O})_n$  isomerization and vertical electron attachment energies (VEAEs). Pole strengths are in parentheses. All energies are in eV. Calculations were executed with the **d-aug-cc-pVTZ** basis set.

| <i>n</i> | Isomer                                          | $\Delta E_{MP2-ZPE}^{CCSD(T)}$ | KT    | D2            | D3            | OVGF-A <sup>a</sup>  | OVGF-B <sup>a</sup> | OVGF-C <sup>a</sup>  | P3            | P3+           | $\Delta_{CCSD(T)}$ |
|----------|-------------------------------------------------|--------------------------------|-------|---------------|---------------|----------------------|---------------------|----------------------|---------------|---------------|--------------------|
| 1        | <b>1a</b> $\text{NH}_4^+(\text{H}_2\text{O})$   | -                              | 3.324 | 3.744(0.988)  | 3.722(0.987)  | 3.725 (0.987)        | 3.726 (0.986)       | <b>3.724 (0.986)</b> | 3.749 (0.986) | 3.748 (0.986) | 3.826              |
| 2        | <b>2a</b> $\text{NH}_4^+(\text{H}_2\text{O})_2$ | 0.000                          | 2.836 | 3.220(0.989)  | 3.217 (0.987) | <b>3.218 (0.988)</b> | 3.221 (0.987)       | 3.217 (0.987)        | 3.226 (0.987) | 3.226 (0.987) | 3.332              |
|          | <b>2b</b> $\text{NH}_4^+(\text{H}_2\text{O})_2$ | 0.130                          | 2.969 | 3.361(0.988)  | 3.348 (0.987) | <b>3.350 (0.987)</b> | 3.352 (0.987)       | 3.349 (0.987)        | 3.368 (0.986) | 3.367 (0.987) | 3.456              |
| 3        | <b>3a</b> $\text{NH}_4^+(\text{H}_2\text{O})_3$ | 0.047                          | 2.569 | 2.937 (0.989) | 2.940 (0.988) | <b>2.940 (0.988)</b> | 2.944 (0.987)       | 2.939 (0.987)        | 2.943 (0.987) | 2.943 (0.987) | 3.826              |
|          | <b>3b</b> $\text{NH}_4^+(\text{H}_2\text{O})_3$ | 0.000                          | 2.490 | 2.840 (0.990) | 2.850 (0.988) | <b>2.849 (0.988)</b> | 2.853 (0.988)       | 2.848 (0.988)        | 2.847 (0.988) | 2.846 (0.988) | 3.332              |
|          | <b>3c</b> $\text{NH}_4^+(\text{H}_2\text{O})_3$ | 0.096                          | 2.554 | 2.910 (0.989) | 2.915 (0.988) | <b>2.915 (0.988)</b> | 2.918 (0.988)       | 2.914 (0.988)        | 2.917 (0.987) | 2.917 (0.987) | 3.456              |
| 4        | <b>4a</b> $\text{NH}_4^+(\text{H}_2\text{O})_4$ | 0.088                          | 2.362 | 2.698 (0.990) | 2.706 (0.989) | <b>2.705 (0.989)</b> | 2.709 (0.988)       | <b>2.705 (0.989)</b> | 2.706 (0.989) | 2.705 (0.988) | 3.071              |
|          | <b>4b</b> $\text{NH}_4^+(\text{H}_2\text{O})_4$ | 0.014                          | 2.301 | 2.638 (0.990) | 2.649 (0.989) | <b>2.647 (0.989)</b> | 2.652 (0.988)       | <b>2.647 (0.988)</b> | 2.645 (0.988) | 2.645 (0.988) | 2.972              |
|          | <b>4c</b> $\text{NH}_4^+(\text{H}_2\text{O})_4$ | 0.133                          | 2.385 | 2.734 (0.989) | 2.742 (0.988) | 2.740 (0.988)        | 2.745 (0.988)       | <b>2.741(0.988)</b>  | 2.742 (0.987) | 2.741 (0.988) | 3.033              |
|          | <b>4d</b> $\text{NH}_4^+(\text{H}_2\text{O})_4$ | 0.067                          | 2.269 | 2.591(0.990)  | 2.607 (0.989) | 2.604 (0.989)        | 2.609 (0.989)       | <b>2.605 (0.989)</b> | 2.599 (0.988) | 2.599 (0.988) | 2.834              |
|          | <b>4e</b> $\text{NH}_4^+(\text{H}_2\text{O})_4$ | 0.000                          | 2.256 | 2.574 (0.990) | 2.591(0.989)  | 2.587 (0.989)        | 2.593 (0.989)       | <b>2.589 (0.989)</b> | 2.582 (0.988) | 2.581(0.989)  | 2.785              |

<sup>a</sup>The numerically recommended OVGF version is in bold.

**Table S6:**  $\text{NH}_4^+(\text{H}_2\text{O})_n$  isomers and VEAEs obtained through total energy differences (indirect method). All energies are in eV.

| <i>n</i> | Isomer                                          | aug-cc-pVTZ         |                        |                                | d-aug-cc-pVTZ       |                        |                                |
|----------|-------------------------------------------------|---------------------|------------------------|--------------------------------|---------------------|------------------------|--------------------------------|
|          |                                                 | $\Delta\text{CCSD}$ | $\Delta\text{CCSD(T)}$ | $\langle\text{S}^2\rangle$ UHF | $\Delta\text{CCSD}$ | $\Delta\text{CCSD(T)}$ | $\langle\text{S}^2\rangle$ UHF |
| 1        | <b>1a</b> $\text{NH}_4^+(\text{H}_2\text{O})$   | 3.769               | 3.821                  | 0.751                          | 3.773               | 3.826                  | 0.751                          |
| 2        | <b>2a</b> $\text{NH}_4^+(\text{H}_2\text{O})_2$ | 3.264               | 3.324                  | 0.750                          | 3.274               | 3.332                  | 0.750                          |
|          | <b>2b</b> $\text{NH}_4^+(\text{H}_2\text{O})_2$ | 3.399               | 3.450                  | 0.751                          | 3.405               | 3.456                  | 0.750                          |
| 3        | <b>3a</b> $\text{NH}_4^+(\text{H}_2\text{O})_3$ | 2.992               | 3.052                  | 0.750                          | 3.005               | 3.071                  | 0.750                          |
|          | <b>3b</b> $\text{NH}_4^+(\text{H}_2\text{O})_3$ | 2.893               | 2.958                  | 0.750                          | 2.909               | 2.972                  | 0.750                          |
|          | <b>3c</b> $\text{NH}_4^+(\text{H}_2\text{O})_3$ | 2.962               | 3.021                  | 0.750                          | 2.976               | 3.033                  | 0.750                          |
| 4        | <b>4a</b> $\text{NH}_4^+(\text{H}_2\text{O})_4$ | 2.757               | 2.819                  | 0.750                          | 2.774               | 2.834                  | 0.750                          |
|          | <b>4b</b> $\text{NH}_4^+(\text{H}_2\text{O})_4$ | 2.695               | 2.768                  | 0.750                          | 2.715               | 2.785                  | 0.750                          |
|          | <b>4c</b> $\text{NH}_4^+(\text{H}_2\text{O})_4$ | 2.795               | 2.864                  | 0.750                          | 2.811               | 2.878                  | 0.750                          |
|          | <b>4d</b> $\text{NH}_4^+(\text{H}_2\text{O})_4$ | 2.646               | 2.711                  | 0.750                          | 2.668               | 2.730                  | 0.750                          |
|          | <b>4e</b> $\text{NH}_4^+(\text{H}_2\text{O})_4$ | 2.627               | 2.695                  | 0.750                          | 2.650               | 2.715                  | 0.750                          |

**Table S7:**  $\text{NH}_4^-(\text{H}_2\text{O})_n$  isomers and their relative energies are in eV. Calculations were executed with the aug-cc-pVTZ basis set.

| $N$ | Isomer                                          | $\Delta E^{MP2}$ | $\Delta E_{ZPE}^{MP2}$ | $\Delta E^{CCSD}$ | $\Delta E^{CCSD(T)}$ | $\Delta E_{MP2,ZPE}^{CCSD(T)}$ |
|-----|-------------------------------------------------|------------------|------------------------|-------------------|----------------------|--------------------------------|
| 1   | $\text{H}^-(\text{NH}_3)\text{H}_2\text{O}$     | 0.000            | 0.000                  | 0.000             | 0.000                | 0.000                          |
|     | $[\text{NH}_4^-]\text{H}_2\text{O}$             | 1.154            | 1.311                  | 1.148             | 1.123                | 1.148                          |
|     | <b>1a</b> $\text{NH}_4^-(\text{H}_2\text{O})$   | 1.214            | 1.446                  | 1.194             | 1.147                | 1.194                          |
| 2   | $\text{H}^-(\text{NH}_3)(\text{H}_2\text{O})_2$ | 0.000            | 0.000                  | 0.000             | 0.000                | 0.000                          |
|     | $[\text{NH}_4^-](\text{H}_2\text{O})_2$         | 1.669            | 1.686                  | 1.667             | 1.656                | 1.667                          |
|     | <b>2a</b> $\text{NH}_4^-(\text{H}_2\text{O})_2$ | 1.649            | 1.819                  | 1.641             | 1.573                | 1.641                          |
|     | <b>2b</b> $\text{NH}_4^-(\text{H}_2\text{O})_2$ | 1.572            | 1.733                  | 1.557             | 1.506                | 1.557                          |
| 3   | $\text{H}^-(\text{NH}_3)(\text{H}_2\text{O})_3$ | 0.000            | 0.000                  | 0.000             | 0.000                | 0.000                          |
|     | $[\text{NH}_4^-](\text{H}_2\text{O})_3$         | 1.912            | 1.933                  | 1.923             | 1.906                | 1.923                          |
|     | <b>3a</b> $\text{NH}_4^-(\text{H}_2\text{O})_3$ | 1.939            | 2.131                  | 1.925             | 1.837                | 1.925                          |
|     | <b>3b</b> $\text{NH}_4^-(\text{H}_2\text{O})_3$ | 1.958            | 2.109                  | 1.971             | 1.891                | 1.971                          |
|     | <b>3c</b> $\text{NH}_4^-(\text{H}_2\text{O})_3$ | 1.832            | 2.034                  | 1.809             | 1.743                | 1.809                          |
| 4   | $\text{H}^-(\text{NH}_3)(\text{H}_2\text{O})_4$ | 0.000            | 0.000                  | 0.000             | 0.000                | 0.000                          |
|     | $[\text{NH}_4^-](\text{H}_2\text{O})_4$         | 2.068            | 2.067                  | 2.061             | 2.054                | 2.061                          |
|     | <b>4a</b> $\text{NH}_4^-(\text{H}_2\text{O})_4$ | 2.153            | 2.298                  | 2.126             | 2.061                | 2.126                          |
|     | <b>4b</b> $\text{NH}_4^-(\text{H}_2\text{O})_4$ | 2.188            | 2.297                  | 2.195             | 2.117                | 2.195                          |
|     | <b>4c</b> $\text{NH}_4^-(\text{H}_2\text{O})_4$ | 2.206            | 2.324                  | 2.178             | 2.109                | 2.178                          |
|     | <b>4d</b> $\text{NH}_4^-(\text{H}_2\text{O})_4$ | 2.267            | 2.349                  | 2.264             | 2.194                | 2.264                          |
|     | <b>4e</b> $\text{NH}_4^-(\text{H}_2\text{O})_4$ | 2.347            | 2.404                  | 2.318             | 2.256                | 2.318                          |

**Table S8:**  $\text{NH}_4^-(\text{H}_2\text{O})_n$  isomers and their vertical electron detachment energies (VEDEs). Pole strengths are in parentheses. All energies are in eV. Calculations were executed with the **d-aug-cc-pVTZ** basis set.

| <i>n</i>                                        | Isomer                                          | KT            | D2            | D3            | OVGF-A <sup>a</sup>  | OVGF-B <sup>a</sup>  | OVGF-C <sup>a</sup>  | P3            | P3+           | BD-T1         |
|-------------------------------------------------|-------------------------------------------------|---------------|---------------|---------------|----------------------|----------------------|----------------------|---------------|---------------|---------------|
| 1                                               | $\text{H}^-(\text{NH}_3)\text{H}_2\text{O}$     | 2.512         | 1.969 (0.893) | 2.220 (0.907) | 2.102 (0.910)        | 2.252 (0.903)        | <b>2.235 (0.904)</b> | 1.987 (0.909) | 1.985 (0.908) | 2.172 (0.882) |
|                                                 | $[\text{NH}_4^-]\text{H}_2\text{O}$             | 0.368         | 0.770 (0.877) | 0.608 (0.854) | 0.402 (0.674)        | 0.652 (0.851)        | <b>0.534 (0.810)</b> | 0.719 (0.851) | 0.723 (0.854) | 0.684 (0.881) |
|                                                 | <b>1a</b> $\text{NH}_4^-(\text{H}_2\text{O})$   | 0.211         | 0.575 (0.872) | 0.422 (0.834) | 0.208 (0.582)        | <b>0.476 (0.830)</b> | 0.312 (0.686)        | 0.511 (0.831) | 0.517 (0.835) | 0.495 (0.862) |
| 2                                               | $\text{H}^-(\text{NH}_3)(\text{H}_2\text{O})_2$ | 3.135         | 2.574 (0.903) | 2.812 (0.908) | 2.695 (0.913)        | 2.835 (0.905)        | <b>2.819 (0.906)</b> | 2.576 (0.909) | 2.576 (0.908) | 2.771 (0.831) |
|                                                 | $[\text{NH}_4^-](\text{H}_2\text{O})_2$         | 0.490         | 0.954 (0.881) | 0.789 (0.867) | 0.613 (0.757)        | 0.824 (0.864)        | <b>0.742 (0.854)</b> | 0.917 (0.864) | 0.920 (0.866) | 0.886 (0.894) |
|                                                 | <b>2a</b> $\text{NH}_4^-(\text{H}_2\text{O})_2$ | 0.186         | 0.607 (0.873) | 0.451 (0.835) | 0.274 (0.680)        | <b>0.498 (0.831)</b> | 0.362 (0.731)        | 0.552 (0.826) | 0.558 (0.835) | 0.539 (0.870) |
|                                                 | <b>2b</b> $\text{NH}_4^-(\text{H}_2\text{O})_2$ | 0.238         | 0.621 (0.862) | 0.454 (0.832) | 0.226 (0.568)        | <b>0.497 (0.829)</b> | 0.369 (0.753)        | 0.562 (0.826) | 0.568 (0.829) | 0.552 (0.864) |
| 3                                               | $\text{H}^-(\text{NH}_3)(\text{H}_2\text{O})_3$ | 3.980         | 3.352 (0.908) | 3.600 (0.908) | 3.479 (0.915)        | <b>3.603 (0.906)</b> | 3.594 (0.907)        | 3.366 (0.908) | 3.364 (0.908) | 3.567 (0.900) |
|                                                 | $[\text{NH}_4^-](\text{H}_2\text{O})_3$         | 0.632         | 1.138 (0.886) | 0.970 (0.876) | 0.807 (0.791)        | 0.999 (0.872)        | <b>0.935 (0.870)</b> | 1.109 (0.73)  | 1.112 (0.874) | 1.075 (0.899) |
|                                                 | <b>3a</b> $\text{NH}_4^-(\text{H}_2\text{O})_3$ | 0.143         | 0.534 (0.860) | 0.372 (0.812) | 0.179 (0.601)        | <b>0.420 (0.811)</b> | 0.252 (0.528)        | 0.464 (0.806) | 0.471 (0.812) | 0.459 (0.856) |
|                                                 | <b>3b</b> $\text{NH}_4^-(\text{H}_2\text{O})_3$ | 0.169         | 0.575 (0.857) | 0.396 (0.814) | 0.204 (0.625)        | <b>0.435 (0.814)</b> | 0.286 (0.595)        | 0.506 (0.804) | 0.513 (0.809) | 0.498 (0.856) |
|                                                 | <b>3c</b> $\text{NH}_4^-(\text{H}_2\text{O})_3$ | 0.186         | 0.574 (0.863) | 0.428 (0.829) | 0.239 (0.618)        | <b>0.475 (0.925)</b> | 0.344 (0.731)        | 0.519 (0.823) | 0.525 (0.827) | 0.537 (0.868) |
| 4                                               | $\text{H}^-(\text{NH}_3)(\text{H}_2\text{O})_4$ | 4.192         | 3.543 (0.908) | 3.781 (0.907) | 3.665 (0.914)        | <b>3.785 (0.906)</b> | 3.776 (0.906)        | 3.551 (0.906) | 3.551 (0.903) | 3.756 (0.896) |
|                                                 | $[\text{NH}_4^-](\text{H}_2\text{O})_4$         | 0.730         | 1.240 (0.889) | 1.071 (0.878) | 0.910 (0.798)        | 1.100 (0.875)        | <b>1.035 (0.872)</b> | 1.210 (0.876) | 1.213 (0.877) | 1.177 (0.900) |
|                                                 | <b>4a</b> $\text{NH}_4^-(\text{H}_2\text{O})_4$ | 0.141         | 0.523 (0.861) | 0.376 (0.819) | 0.199 (0.623)        | <b>0.421 (0.817)</b> | 0.275 (0.632)        | 0.464 (0.811) | 0.470 (0.817) | 0.473 (0.860) |
|                                                 | <b>4b</b> $\text{NH}_4^-(\text{H}_2\text{O})_4$ | 0.148         | 0.522 (0.838) | 0.331 (0.793) | 0.113 (0.522)        | <b>0.368 (0.795)</b> | 0.368 (0.795)        | 0.444 (0.779) | 0.452 (0.785) | 0.432 (0.853) |
|                                                 | <b>4c</b> $\text{NH}_4^-(\text{H}_2\text{O})_4$ | 0.162         | 0.521 (0.840) | 0.348 (0.800) | 0.117 (0.434)        | <b>0.390 (0.800)</b> | 0.243 (0.616)        | 0.449 (0.789) | 0.457 (0.795) | 0.455 (0.858) |
|                                                 | <b>4d</b> $\text{NH}_4^-(\text{H}_2\text{O})_4$ | 0.173         | 0.586 (0.848) | 0.404 (0.811) | 0.202 (0.603)        | <b>0.439 (0.811)</b> | 0.314 (0.676)        | 0.523 (0.798) | 0.529 (0.803) | 0.515 (0.859) |
| <b>4e</b> $\text{NH}_4^-(\text{H}_2\text{O})_4$ | 0.183                                           | 0.566 (0.839) | 0.393 (0.807) | 0.183 (0.538) | <b>0.427 (0.807)</b> | 0.312 (0.696)        | 0.503 (0.794)        | 0.509 (0.799) | 0.534 (0.863) |               |

<sup>a</sup>The numerically recommended OVGF version is in bold.



**Table S9:**  $\text{NH}_4^-(\text{H}_2\text{O})_n$  isomers and VEDEs obtained through total energy differences (indirect method). All energies are in eV.

| <i>n</i> | Isomer                                          | aug-cc-pVTZ         |                        |                                | d-aug-cc-pVTZ       |                        |                                |
|----------|-------------------------------------------------|---------------------|------------------------|--------------------------------|---------------------|------------------------|--------------------------------|
|          |                                                 | $\Delta\text{CCSD}$ | $\Delta\text{CCSD(T)}$ | $\langle\text{S}^2\rangle$ UHF | $\Delta\text{CCSD}$ | $\Delta\text{CCSD(T)}$ | $\langle\text{S}^2\rangle$ UHF |
| 1        | $\text{H}^-(\text{NH}_3)\text{H}_2\text{O}$     | 2.032               | 2.080                  | 0.755                          | 2.036               | 2.085                  | 0.755                          |
|          | $[\text{NH}_4^-]\text{H}_2\text{O}$             | 0.518               | 0.606                  | 0.751                          | 0.594               | 0.675                  | 0.751                          |
|          | <b>1a</b> $\text{NH}_4^-(\text{H}_2\text{O})$   | 0.280               | 0.378                  | 0.751                          | 0.407               | 0.491                  | 0.751                          |
| 2        | $\text{H}^-(\text{NH}_3)(\text{H}_2\text{O})_2$ | 2.634               | 2.689                  | 0.753                          | 2.637               | 2.693                  | 0.753                          |
|          | $[\text{NH}_4^-](\text{H}_2\text{O})_2$         | 0.745               | 0.850                  | 0.751                          | 0.787               | 0.886                  | 0.751                          |
|          | <b>2a</b> $\text{NH}_4^-(\text{H}_2\text{O})_2$ | 0.343               | 0.464                  | 0.751                          | 0.449               | 0.553                  | 0.751                          |
|          | <b>2b</b> $\text{NH}_4^-(\text{H}_2\text{O})_2$ | 0.359               | 0.472                  | 0.751                          | 0.456               | 0.556                  | 0.751                          |
| 3        | $\text{H}^-(\text{NH}_3)(\text{H}_2\text{O})_3$ | 3.412               | 3.466                  | 0.754                          | 3.416               | 3.470                  | 0.754                          |
|          | $[\text{NH}_4^-](\text{H}_2\text{O})_3$         | 0.940               | 1.055                  | 0.751                          | 0.971               | 1.081                  | 0.751                          |
|          | <b>3a</b> $\text{NH}_4^-(\text{H}_2\text{O})_3$ | 0.237               | 0.380                  | 0.750                          | 0.360               | 0.481                  | 0.750                          |
|          | <b>3b</b> $\text{NH}_4^-(\text{H}_2\text{O})_3$ | 0.296               | 0.432                  | 0.751                          | 0.396               | 0.517                  | 0.751                          |
|          | <b>3c</b> $\text{NH}_4^-(\text{H}_2\text{O})_3$ | 0.339               | 0.463                  | 0.751                          | 0.444               | 0.551                  | 0.754                          |
| 4        | $\text{H}^-(\text{NH}_3)(\text{H}_2\text{O})_4$ | 3.598               | 3.655                  | 0.754                          | 3.601               | 3.659                  | 0.754                          |
|          | $[\text{NH}_4^-](\text{H}_2\text{O})_4$         | 1.045               | 1.160                  | 0.751                          | 1.073               | 1.183                  | 0.751                          |
|          | <b>4a</b> $\text{NH}_4^-(\text{H}_2\text{O})_4$ | 0.250               | 0.379                  | 0.751                          | 0.372               | 0.481                  | 0.751                          |
|          | <b>4b</b> $\text{NH}_4^-(\text{H}_2\text{O})_4$ | 0.206               | 0.349                  | 0.751                          | 0.313               | 0.439                  | 0.751                          |
|          | <b>4c</b> $\text{NH}_4^-(\text{H}_2\text{O})_4$ | 0.242               | 0.388                  | 0.751                          | 0.314               | 0.474                  | 0.751                          |
|          | <b>4d</b> $\text{NH}_4^-(\text{H}_2\text{O})_4$ | 0.305               | 0.449                  | 0.751                          | 0.402               | 0.530                  | 0.751                          |
|          | <b>4e</b> $\text{NH}_4^-(\text{H}_2\text{O})_4$ | 0.345               | 0.495                  | 0.751                          | 0.429               | 0.564                  | 0.751                          |

**Table S10:** Twenty vertical electron affinities (EAs) and radical excitation energies (EEs) of **3b** NH<sub>4</sub><sup>+</sup>(H<sub>2</sub>O)<sub>3</sub>. All energies are in eV. The numbers in second column refer to Figure 5 in the main text.

| <i>l</i> | Dyson # | Final State      | KT    | KT EEs | D2    | D2 EEs | D3    | D3 EEs | OVSF-B | OVSF-B EEs | P3    | P3 EEs | P3+   | P3+ EEs |
|----------|---------|------------------|-------|--------|-------|--------|-------|--------|--------|------------|-------|--------|-------|---------|
| s        | 1       | 1 <sup>2</sup> A | 2.490 | 0.000  | 2.840 | 0.000  | 2.850 | 0.000  | 2.849  | 0.000      | 2.847 | 0.000  | 2.846 | 0.000   |
| p        | 2,3     | 1 <sup>2</sup> E | 1.937 | 0.553  | 2.144 | 0.696  | 2.154 | 0.696  | 2.153  | 0.696      | 2.152 | 0.695  | 2.152 | 0.694   |
|          | 4       | 2 <sup>2</sup> A | 1.864 | 0.626  | 2.012 | 0.828  | 2.023 | 0.827  | 2.021  | 0.828      | 2.019 | 0.828  | 2.018 | 0.828   |
| d        | 5,6     | 2 <sup>2</sup> E | 1.377 | 1.113  | 1.477 | 1.363  | 1.483 | 1.367  | 1.482  | 1.367      | 1.483 | 1.364  | 1.482 | 1.364   |
|          | 7       | 3 <sup>2</sup> A | 1.327 | 1.163  | 1.434 | 1.406  | 1.438 | 1.412  | 1.438  | 1.411      | 1.439 | 1.408  | 1.438 | 1.408   |
|          | 8,9     | 3 <sup>2</sup> E | 1.246 | 1.244  | 1.307 | 1.533  | 1.314 | 1.536  | 1.314  | 1.535      | 1.312 | 1.535  | 1.312 | 1.534   |
| s        | 10      | 4 <sup>2</sup> A | 1.151 | 1.339  | 1.261 | 1.579  | 1.264 | 1.586  | 1.264  | 1.585      | 1.263 | 1.584  | 1.263 | 1.583   |
| p        | 11,12   | 4 <sup>2</sup> E | 0.880 | 1.610  | 0.991 | 1.849  | 0.995 | 1.855  | 0.995  | 1.854      | 0.994 | 1.853  | 0.994 | 1.852   |
|          | 13      | 5 <sup>2</sup> A | 0.892 | 1.598  | 0.980 | 1.860  | 0.984 | 1.866  | 0.983  | 1.866      | 0.983 | 1.864  | 0.983 | 1.863   |
| f        | 14,15   | 5 <sup>2</sup> E | 0.739 | 1.751  | 0.799 | 2.041  | 0.802 | 2.048  | 0.801  | 2.048      | 0.803 | 2.044  | 0.803 | 2.043   |
|          | 16      | 6 <sup>2</sup> A | 0.635 | 1.855  | 0.699 | 2.141  | 0.704 | 2.146  | 0.704  | 2.145      | 0.704 | 2.143  | 0.703 | 2.143   |
|          | 17,18   | 6 <sup>2</sup> E | 0.578 | 1.912  | 0.650 | 2.190  | 0.656 | 2.194  | 0.655  | 2.194      | 0.655 | 2.192  | 0.654 | 2.192   |
|          | 19      | 7 <sup>2</sup> A | 0.492 | 1.998  | 0.599 | 2.241  | 0.602 | 2.248  | 0.602  | 2.247      | 0.603 | 2.244  | 0.602 | 2.244   |
|          | 20      | 8 <sup>2</sup> A | 0.528 | 1.962  | 0.595 | 2.245  | 0.601 | 2.249  | 0.599  | 2.250      | 0.599 | 2.248  | 0.598 | 2.248   |

**Table S11:** Eighteen vertical electron affinities (EAs) and radical excitation energies (EEs) for **4e** NH<sub>4</sub><sup>+</sup>(H<sub>2</sub>O)<sub>4</sub>. All energies are in eV. The numbers in second column refer to Figure 6 in the main text.

| <i>l</i> | Dyson # | Final State                   | KT    | KT EEs | D2    | D2 EEs | D3    | D3 EEs | OVSF-B | OVSF-B EEs | P3    | P3 EEs | P3+   | P3+ EEs |
|----------|---------|-------------------------------|-------|--------|-------|--------|-------|--------|--------|------------|-------|--------|-------|---------|
| s        | 1       | 1 <sup>2</sup> A <sub>1</sub> | 2.256 | 0.000  | 2.574 | 0.000  | 2.591 | 0.000  | 2.589  | 0.000      | 2.582 | 0.000  | 2.581 | 0.000   |
| p        | 2       | 1 <sup>2</sup> B              | 1.807 | 0.449  | 1.995 | 0.579  | 2.008 | 0.583  | 2.006  | 0.583      | 2.004 | 0.578  | 2.003 | 0.578   |
|          | 3,4     | 1 <sup>2</sup> E              | 1.800 | 0.456  | 1.988 | 0.586  | 2.001 | 0.590  | 1.999  | 0.590      | 1.996 | 0.586  | 1.996 | 0.585   |
| d        | 5       | 2 <sup>2</sup> B              | 1.311 | 0.945  | 1.406 | 1.168  | 1.413 | 1.178  | 1.412  | 1.177      | 1.412 | 1.170  | 1.411 | 1.170   |
|          | 6,7     | 2 <sup>2</sup> E              | 1.290 | 0.966  | 1.382 | 1.192  | 1.389 | 1.202  | 1.387  | 1.202      | 1.387 | 1.195  | 1.387 | 1.194   |
|          | 8       | 2 <sup>2</sup> A              | 1.236 | 1.020  | 1.302 | 1.272  | 1.310 | 1.281  | 1.310  | 1.279      | 1.308 | 1.274  | 1.307 | 1.274   |
|          | 9       | 3 <sup>2</sup> B              | 1.190 | 1.066  | 1.248 | 1.326  | 1.256 | 1.335  | 1.256  | 1.333      | 1.253 | 1.329  | 1.253 | 1.328   |
| s        | 10      | 3 <sup>2</sup> A              | 1.109 | 1.147  | 1.233 | 1.341  | 1.237 | 1.354  | 1.237  | 1.352      | 1.234 | 1.348  | 1.234 | 1.347   |
| p        | 11,12   | 3 <sup>2</sup> E              | 0.853 | 1.403  | 0.941 | 1.633  | 0.946 | 1.645  | 0.945  | 1.644      | 0.944 | 1.638  | 0.943 | 1.638   |
|          | 13      | 4 <sup>2</sup> B              | 0.812 | 1.444  | 0.928 | 1.646  | 0.934 | 1.657  | 0.933  | 1.656      | 0.931 | 1.651  | 0.931 | 1.650   |
| d        | 14      | 4 <sup>2</sup> A              | 0.706 | 1.550  | 0.773 | 1.801  | 0.777 | 1.814  | 0.776  | 1.813      | 0.778 | 1.804  | 0.777 | 1.804   |
|          | 15      | 5 <sup>2</sup> A              | 0.688 | 1.568  | 0.749 | 1.825  | 0.753 | 1.838  | 0.752  | 1.837      | 0.753 | 1.829  | 0.753 | 1.828   |
|          | 16,17   | 4 <sup>2</sup> E              | 0.588 | 1.668  | 0.640 | 1.934  | 0.647 | 1.944  | 0.646  | 1.943      | 0.646 | 1.936  | 0.645 | 1.936   |
|          | 18      | 5 <sup>2</sup> B              | 0.495 | 1.761  | 0.595 | 1.979  | 0.602 | 1.989  | 0.601  | 1.988      | 0.598 | 1.984  | 0.598 | 1.983   |

## I. Sample Inputs for Electron Propagator Calculations of Vertical Electron Binding Energies

A. Sample input for calculation of vertical electron affinities (VEAs) of 1a NH<sub>4</sub><sup>+</sup>(H<sub>2</sub>O) to Gaussian 16 Program.

\*\*\*\*\*

```
#p ept gfinput gfprint iop(6/7=3,9/11=30100) daug-cc-pVTZ
```

Title: Diagonal EPT calculations for VEAs of 1a NH<sub>4</sub><sup>+</sup>(H<sub>2</sub>O)

```
+1 1
H 1.6871400000 -0.5171200000 -0.8070700000
H 0.2861700000 0.0026100000 -0.0003000000
H 1.6866500000 -0.4397700000 0.8519600000
H 1.6920900000 0.9554200000 -0.0446800000
N 1.3405900000 -0.0001900000 0.0000400000
O -1.3568500000 0.0002400000 -0.0001000000
H -1.9392600000 -0.7683200000 0.0002900000
H -1.9421700000 0.7665700000 0.0002900000
```

```
9 12
```

\*\*\*\*\*

The option ept invokes the electron propagator theory (EPT) calculations and the IOP 9/3=30100 requests the program to carry out EPT calculations with the diagonal P3+, P3, OVGf, D3, D2 and KT methods and to read an additional line (the last line of the input) containing orbitals for which electron binding energies (vertical electron affinities in this case) will be calculated.

In this case, diagonal EPT calculations are carried out on NH<sub>4</sub><sup>+</sup>(H<sub>2</sub>O) which has 20 electrons in 10 molecular orbitals. As the standard frozen-core approximation is a default in Gaussian calculations, the 2 lowest-energy occupied orbitals are therefore frozen. The last line of the input (9 12) therefore requests a calculation of vertical electron affinities (VEAs) for LUMO, LUMO +1, LUMO +2 and LUMO+3 orbitals.

The p, gfinput, gfprint, and IOP 6/7=3 are necessary to use the Gaussian output file as an input to Molden.

**B. Sample input for calculation of vertical electron detachment energies (VEDEs) of 1a NH<sub>4</sub><sup>-</sup>(H<sub>2</sub>O) to Gaussian 16 Program.**

\*\*\*\*\*

```
#p ept gfinput gfp rint iop(6/7=3,9/11=30100) daug-cc-pVTZ
```

Title: Diagonal EPT calculations for VEAs of 1a NH<sub>4</sub><sup>-</sup>(H<sub>2</sub>O)

```
-1 1
H -0.9319990000 -0.7827910000 -0.0245850000
H 0.4611630000 1.9566870000 0.0249990000
H -2.1493760000 -0.0933860000 0.7770270000
H -1.1521280000 0.7762710000 -0.1550320000
N -1.6826470000 -0.1039260000 -0.1242420000
O 1.5557310000 -0.2103940000 0.1080620000
H 2.0051560000 -0.1690020000 -0.7427290000
H 1.0998660000 0.7228570000 0.1255150000
```

```
7 9
```

\*\*\*\*\*

See the previous example for the detailed explanation of keywords.

In this case, diagonal EPT calculations are carried out on NH<sub>4</sub><sup>-</sup>(H<sub>2</sub>O) which has 22 electrons in 11 molecular orbitals. As the standard frozen-core approximation is a default in Gaussian calculations, the 2 lowest-energy occupied orbitals are therefore frozen. The last line of the input (7 9) therefore requests a calculation of vertical electron detachment energies (VEDEs) for HOMO-2, HOMO-1, and HOMO orbitals.

Results will be reported for diagonal P3+, P3, OVGf, D3, D2 and KT methods.

## II. Cartesian Coordinates of all the Optimized $\text{OH}_3^\pm(\text{H}_2\text{O})_n$ geometries

### A. Optimized geometries of the $\text{NH}_4^+(\text{H}_2\text{O})_n$ Cations

#### $\text{NH}_4^+(\text{H}_2\text{O})_n$ :

##### 1a $\text{NH}_4^+(\text{H}_2\text{O})$

|   |               |               |               |
|---|---------------|---------------|---------------|
| H | 1.6871400000  | -0.5171200000 | -0.8070700000 |
| H | 0.2861700000  | 0.0026100000  | -0.0003000000 |
| H | 1.6866500000  | -0.4397700000 | 0.8519600000  |
| H | 1.6920900000  | 0.9554200000  | -0.0446800000 |
| N | 1.3405900000  | -0.0001900000 | 0.0000400000  |
| O | -1.3568500000 | 0.0002400000  | -0.0001000000 |
| H | -1.9392600000 | -0.7683200000 | 0.0002900000  |
| H | -1.9421700000 | 0.7665700000  | 0.0002900000  |

#### $\text{NH}_4^+(\text{H}_2\text{O})_2$ isomers:

##### 2a $\text{NH}_4^+(\text{H}_2\text{O})_2$

|   |               |               |               |
|---|---------------|---------------|---------------|
| H | 0.8593500000  | 0.4589200000  | -0.0000100000 |
| H | -0.8524200000 | 0.4757300000  | -0.0000200000 |
| H | 0.0138600000  | 1.6557700000  | 0.8262700000  |
| H | 0.0138400000  | 1.6557600000  | -0.8263000000 |
| N | 0.0090200000  | 1.0622400000  | -0.0000100000 |
| O | -2.2576300000 | -0.5112800000 | -0.0000200000 |
| H | -2.7675100000 | -0.8006200000 | 0.7650100000  |
| H | -2.7657000000 | -0.8031600000 | -0.7652900000 |
| O | 2.2548000000  | -0.5301400000 | 0.0000300000  |
| H | 3.1779700000  | -0.2532600000 | -0.0011800000 |
| H | 2.2800900000  | -1.4934900000 | 0.0015000000  |

##### 2b $\text{NH}_4^+(\text{H}_2\text{O})_2$

|   |               |               |               |
|---|---------------|---------------|---------------|
| H | -2.8259800000 | -0.1999100000 | 0.8288300000  |
| H | -2.8257900000 | -0.1999500000 | -0.8291700000 |
| H | -1.3586700000 | 0.1265200000  | -0.0000100000 |
| H | -2.0841400000 | -1.4263900000 | -0.0000500000 |
| N | -2.2804000000 | -0.4272500000 | -0.0001000000 |
| O | 2.3038100000  | -0.4480500000 | -0.0000200000 |
| H | 2.8849700000  | -0.5184900000 | -0.7651100000 |
| H | 2.8849500000  | -0.5186700000 | 0.7650800000  |
| O | -0.0171700000 | 0.8785200000  | 0.0001200000  |
| H | 0.8718400000  | 0.4533900000  | 0.0000700000  |
| H | 0.1225500000  | 1.8305000000  | 0.0002300000  |

#### $\text{NH}_4^+(\text{H}_2\text{O})_3$ isomers:

##### 3a $\text{NH}_4^+(\text{H}_2\text{O})_3$

|   |               |               |               |
|---|---------------|---------------|---------------|
| H | -1.4703000000 | -0.8324400000 | 0.0000300000  |
| H | -2.6875800000 | 0.0000600000  | 0.8292500000  |
| H | -1.4702900000 | 0.8324400000  | -0.0000700000 |
| H | -2.6875900000 | -0.0000600000 | -0.8292800000 |

|   |               |               |               |
|---|---------------|---------------|---------------|
| N | -2.1003100000 | 0.0000000000  | -0.0000200000 |
| O | 2.1405000000  | 0.0000000000  | -0.0000200000 |
| H | 2.7314800000  | 0.0002400000  | 0.7635500000  |
| H | 2.7315300000  | -0.0002300000 | -0.7635400000 |
| O | -0.0806000000 | 1.8002200000  | 0.0000600000  |
| H | 0.0655900000  | 2.7513000000  | -0.0002000000 |
| H | 0.7946800000  | 1.3786600000  | -0.0001800000 |
| O | -0.0806000000 | -1.8002200000 | -0.0000200000 |
| H | 0.0655900000  | -2.7513000000 | 0.0002200000  |
| H | 0.7946800000  | -1.3786600000 | 0.0001600000  |

**3b NH<sub>4</sub><sup>+</sup>(H<sub>2</sub>O)<sub>3</sub>**

|   |               |               |               |
|---|---------------|---------------|---------------|
| H | 0.7670000000  | 0.6072200000  | 0.3685900000  |
| H | 0.0000000000  | 0.0000100000  | 1.7226200000  |
| H | -0.9093700000 | 0.3606400000  | 0.3685900000  |
| H | 0.1423600000  | -0.9678500000 | 0.3686000000  |
| N | 0.0000000000  | 0.0000100000  | 0.7066100000  |
| O | 0.3736100000  | -2.6196900000 | -0.2243700000 |
| H | -0.0283200000 | -3.4308200000 | 0.1053800000  |
| H | 0.9949600000  | -2.9076500000 | -0.9019500000 |
| O | -2.4555300000 | 0.9862900000  | -0.2243800000 |
| H | -2.9569700000 | 1.7400000000  | 0.1052900000  |
| H | -3.0156500000 | 0.5920600000  | -0.9018400000 |
| O | 2.0819200000  | 1.6334000000  | -0.2243700000 |
| H | 2.0205500000  | 2.3157200000  | -0.9017100000 |
| H | 2.9854300000  | 1.6906400000  | 0.1051000000  |

**3c NH<sub>4</sub><sup>+</sup>(H<sub>2</sub>O)<sub>3</sub>**

|   |               |               |               |
|---|---------------|---------------|---------------|
| H | -0.2644300000 | 0.4826500000  | 0.3715700000  |
| H | -0.8765100000 | 1.5497500000  | -0.7899400000 |
| H | -1.9287800000 | 0.4648800000  | -0.0665300000 |
| H | -1.2934600000 | 1.7581500000  | 0.7946800000  |
| N | -1.0942000000 | 1.0658700000  | 0.0774100000  |
| O | 3.3768100000  | -0.0713300000 | -0.5255400000 |
| H | 3.7539800000  | -0.7199800000 | -1.1293200000 |
| H | 4.1315800000  | 0.4153200000  | -0.1776400000 |
| O | -3.3189900000 | -0.5515700000 | -0.3149800000 |
| H | -4.2486500000 | -0.2988700000 | -0.3320700000 |
| H | -3.3130900000 | -1.4988800000 | -0.4904800000 |
| O | 1.0243100000  | -0.4131200000 | 0.7661100000  |
| H | 1.1332300000  | -0.9925400000 | 1.5260900000  |
| H | 1.9084500000  | -0.3333900000 | 0.3470900000  |

**NH<sub>4</sub><sup>+</sup>(H<sub>2</sub>O)<sub>4</sub> isomers:**

**4a NH<sub>4</sub><sup>+</sup>(H<sub>2</sub>O)<sub>4</sub>**

|   |              |               |               |
|---|--------------|---------------|---------------|
| H | 2.2002700000 | 0.8328900000  | -0.3168900000 |
| H | 3.0548600000 | -0.0000100000 | -1.5186800000 |

|   |               |               |               |
|---|---------------|---------------|---------------|
| H | 3.6325900000  | 0.0000000000  | 0.0357100000  |
| H | 2.2002800000  | -0.8328900000 | -0.3168800000 |
| N | 2.7937500000  | 0.0000000000  | -0.5370700000 |
| O | 0.8966200000  | 1.7752600000  | 0.1511900000  |
| H | 0.7409500000  | 2.7188000000  | 0.2514300000  |
| H | 0.0887100000  | 1.3132500000  | 0.4476500000  |
| O | 0.8966200000  | -1.7752600000 | 0.1511900000  |
| H | 0.0887100000  | -1.3132400000 | 0.4476600000  |
| H | 0.7409600000  | -2.7188000000 | 0.2514700000  |
| O | -3.3339600000 | 0.0000000000  | -0.6733900000 |
| H | -3.8785200000 | -0.7647000000 | -0.8868300000 |
| H | -3.8785600000 | 0.7646800000  | -0.8867700000 |
| O | -1.1102000000 | 0.0000000000  | 0.8835900000  |
| H | -1.4038100000 | 0.0000000000  | 1.8017700000  |
| H | -1.9354200000 | 0.0000000000  | 0.3492900000  |

#### 4b NH<sub>4</sub><sup>+</sup>(H<sub>2</sub>O)<sub>4</sub>

|   |               |               |               |
|---|---------------|---------------|---------------|
| H | 0.5530100000  | 0.8264100000  | 0.6542600000  |
| H | 2.0007100000  | -0.0000200000 | 0.2959200000  |
| H | 1.3880800000  | -0.0000400000 | 1.8519600000  |
| H | 0.5530200000  | -0.8264600000 | 0.6542300000  |
| N | 1.1408200000  | -0.0000300000 | 0.8673300000  |
| O | -0.8191000000 | 1.8125400000  | 0.1898400000  |
| H | -1.6394100000 | 1.3762500000  | -0.0914400000 |
| H | -0.9865400000 | 2.7591700000  | 0.1552600000  |
| O | -0.8191200000 | -1.8125600000 | 0.1898000000  |
| H | -1.6394200000 | -1.3762500000 | -0.0914700000 |
| H | -0.9865500000 | -2.7591800000 | 0.1551200000  |
| O | 3.5268800000  | 0.0000200000  | -0.6340500000 |
| H | 4.0226000000  | -0.7637000000 | -0.9481800000 |
| H | 4.0222000000  | 0.7637700000  | -0.9487300000 |
| O | -2.9265900000 | 0.0000200000  | -0.5339600000 |
| H | -3.2369700000 | 0.0000400000  | -1.4478800000 |
| H | -3.7329900000 | 0.0000300000  | -0.0035300000 |

#### 4c NH<sub>4</sub><sup>+</sup>(H<sub>2</sub>O)<sub>4</sub>

|   |               |               |               |
|---|---------------|---------------|---------------|
| H | 2.7005500000  | -1.7055900000 | 0.2891400000  |
| H | 2.0700200000  | -0.1445200000 | 0.0879400000  |
| H | 2.3777900000  | -1.1554600000 | -1.2376900000 |
| H | 1.1000400000  | -1.5117600000 | -0.1996800000 |
| N | 2.0709500000  | -1.1364200000 | -0.2693600000 |
| O | 1.7300100000  | 1.3350100000  | 0.6626600000  |
| H | 0.9298500000  | 1.7020900000  | 0.2316100000  |
| H | 2.2613700000  | 2.0738500000  | 0.9728600000  |
| O | -0.5291200000 | -1.9688000000 | -0.0375800000 |
| H | -1.2751800000 | -1.3609300000 | 0.1048200000  |
| H | -0.8952900000 | -2.8573800000 | 0.0099200000  |
| O | -0.5453700000 | 1.7643400000  | -0.7036500000 |
| H | -1.3487500000 | 1.3369200000  | -0.3693900000 |
| H | -0.8403500000 | 2.5315800000  | -1.2041100000 |



|   |               |               |               |
|---|---------------|---------------|---------------|
| O | -2.5711200000 | -0.0048500000 | 0.3429400000  |
| H | -3.3858600000 | -0.1118600000 | -0.1633900000 |
| H | -2.8659900000 | 0.1523900000  | 1.2484900000  |

**4d NH<sub>4</sub><sup>+</sup>(H<sub>2</sub>O)<sub>4</sub>**

|   |               |               |               |
|---|---------------|---------------|---------------|
| H | -1.5368400000 | -0.7359200000 | -0.3650600000 |
| H | -1.1862300000 | 0.9169000000  | -0.3290300000 |
| H | 0.0506500000  | -0.2137200000 | -0.0397000000 |
| H | -0.6172000000 | -0.0404200000 | -1.5693200000 |
| N | -0.8249300000 | -0.0183700000 | -0.5754700000 |
| O | 1.4829200000  | -0.4878800000 | 0.7939200000  |
| H | 1.5988300000  | -0.9007900000 | 1.6545700000  |
| H | 2.3832700000  | -0.3543500000 | 0.4332600000  |
| O | 3.9156200000  | -0.0483500000 | -0.3665000000 |
| H | 4.5024000000  | 0.6798100000  | -0.1373100000 |
| H | 4.4946000000  | -0.7366500000 | -0.7101400000 |
| O | -1.8179400000 | 2.5312300000  | 0.1252900000  |
| H | -1.4770000000 | 3.0934300000  | 0.8291400000  |
| H | -2.4898200000 | 3.0634000000  | -0.3141600000 |
| O | -2.7778300000 | -1.9792600000 | -0.0084700000 |
| H | -3.6388200000 | -1.8429300000 | 0.4011400000  |
| H | -2.7314400000 | -2.9260900000 | -0.1790500000 |

**4e NH<sub>4</sub><sup>+</sup>(H<sub>2</sub>O)<sub>4</sub>**

|   |               |               |               |
|---|---------------|---------------|---------------|
| H | 0.5964700000  | 0.4968900000  | 0.6769100000  |
| H | -0.5949500000 | -0.6776700000 | 0.4975700000  |
| H | -0.5963500000 | 0.6776300000  | -0.4960300000 |
| H | 0.5948400000  | -0.4967100000 | -0.6784000000 |
| N | 0.0000000000  | 0.0000400000  | 0.0000200000  |
| O | 1.6551400000  | -1.3666400000 | -1.8739200000 |
| H | 1.5758000000  | -2.2817600000 | -2.1634600000 |
| H | 2.4365300000  | -1.0319000000 | -2.3265700000 |
| O | -1.6593700000 | 1.8716700000  | -1.3647100000 |
| H | -1.5815700000 | 2.1612400000  | -2.2799600000 |
| H | -2.4409100000 | 2.3233300000  | -1.0290100000 |
| O | 1.6597000000  | 1.3669500000  | 1.8697500000  |
| H | 1.5807700000  | 2.2819500000  | 2.1597800000  |
| H | 2.4425100000  | 1.0324300000  | 2.3200900000  |
| O | -1.6554800000 | -1.8720200000 | 1.3688600000  |
| H | -1.5749800000 | -2.1620400000 | 2.2837400000  |
| H | -2.4381500000 | -2.3233200000 | 1.0353200000  |

## B. Optimized geometries of the $\text{NH}_4^-(\text{H}_2\text{O})_n$ Anions

### $\text{NH}_4^-(\text{H}_2\text{O})$ isomers:

#### $\text{H}^-(\text{NH}_3)\text{H}_2\text{O}$

|   |               |               |               |
|---|---------------|---------------|---------------|
| H | -0.9319990000 | -0.7827910000 | -0.0245850000 |
| H | 0.4611630000  | 1.9566870000  | 0.0249990000  |
| H | -2.1493760000 | -0.0933860000 | 0.7770270000  |
| H | -1.1521280000 | 0.7762710000  | -0.1550320000 |
| N | -1.6826470000 | -0.1039260000 | -0.1242420000 |
| O | 1.5557310000  | -0.2103940000 | 0.1080620000  |
| H | 2.0051560000  | -0.1690020000 | -0.7427290000 |
| H | 1.0998660000  | 0.7228570000  | 0.1255150000  |

#### $[\text{NH}_4^-]\text{H}_2\text{O}$

|   |               |               |               |
|---|---------------|---------------|---------------|
| H | 2.6369490000  | -0.0191020000 | 0.8651790000  |
| H | 1.4467180000  | -0.8496710000 | -0.0306810000 |
| H | 1.4475700000  | 0.8508990000  | 0.0063190000  |
| H | 2.6720490000  | 0.0180980000  | -0.8406110000 |
| N | 2.0549290000  | 0.0000580000  | 0.0000190000  |
| O | -2.3812710000 | -0.0007050000 | 0.0001890000  |
| H | -1.7648620000 | -0.7450360000 | -0.0011310000 |
| H | -1.7727600000 | 0.7500440000  | -0.0007210000 |

#### 1a $\text{NH}_4^-(\text{H}_2\text{O})$

|   |               |               |               |
|---|---------------|---------------|---------------|
| H | 1.9281200000  | 0.0000900000  | -0.8738400000 |
| H | 0.3492700000  | 0.0000000000  | -0.2090300000 |
| H | 1.6010300000  | -0.8454600000 | 0.5592200000  |
| H | 1.6009900000  | 0.8453800000  | 0.5593700000  |
| N | 1.3733800000  | 0.0000000000  | 0.0012100000  |
| O | -1.4858100000 | 0.0000000000  | -0.1230000000 |
| H | -1.6032700000 | -0.7627200000 | 0.4698900000  |
| H | -1.6032700000 | 0.7627200000  | 0.4699000000  |

### $\text{NH}_4^-(\text{H}_2\text{O})_2$ isomers:

#### $\text{H}^-(\text{NH}_3)(\text{H}_2\text{O})_2$

|   |               |               |               |
|---|---------------|---------------|---------------|
| H | 0.3432350000  | -0.0440850000 | 1.8417490000  |
| H | -1.2566730000 | 0.1414290000  | 0.7677080000  |
| H | -1.2443520000 | 1.0092740000  | -0.5711780000 |
| N | -1.7840680000 | 0.2857600000  | -0.1043550000 |
| O | 0.5884860000  | -1.6831460000 | -0.1206080000 |
| H | 0.5786070000  | -1.1504440000 | 0.7296580000  |
| H | -0.2816060000 | -1.4509190000 | -0.4725550000 |
| O | 1.2484670000  | 1.3474700000  | -0.1112390000 |
| H | 1.3946950000  | 0.5336040000  | -0.6107620000 |
| H | 0.9306210000  | 0.9422850000  | 0.7495880000  |
| H | -2.6716710000 | 0.7039420000  | 0.1510520000  |

**[NH<sub>4</sub><sup>-</sup>](H<sub>2</sub>O)<sub>2</sub>**

|   |               |               |               |
|---|---------------|---------------|---------------|
| H | 0.8576730000  | 2.4026500000  | -0.0139020000 |
| H | 0.0022270000  | 1.2096370000  | 0.8575590000  |
| N | 0.0000530000  | 1.8041100000  | -0.0008540000 |
| O | -3.1970450000 | -1.0698580000 | 0.0008050000  |
| H | -2.2464060000 | -1.2436090000 | -0.0066520000 |
| H | -3.2170700000 | -0.1041890000 | 0.0061940000  |
| O | 3.1968880000  | -1.0700250000 | 0.0003860000  |
| H | 3.2180530000  | -0.1045070000 | 0.0164280000  |
| H | 2.2461200000  | -1.2424460000 | -0.0165570000 |
| H | 0.0008240000  | 1.1743040000  | -0.8341530000 |
| H | -0.8605290000 | 2.3984460000  | -0.0124630000 |

**2a NH<sub>4</sub><sup>-</sup>(H<sub>2</sub>O)<sub>2</sub>**

|   |               |               |               |
|---|---------------|---------------|---------------|
| H | 0.8436300000  | 0.7163300000  | 0.0000000000  |
| H | -0.8436000000 | 0.7163900000  | 0.0000100000  |
| H | 0.0000500000  | 1.9257200000  | 0.8422300000  |
| H | 0.0000400000  | 1.9257100000  | -0.8422400000 |
| N | 0.0000300000  | 1.3342100000  | 0.0000000000  |
| O | -2.0307100000 | -0.6255000000 | 0.0000000000  |
| H | -1.7274600000 | -1.1538200000 | 0.7614000000  |
| H | -1.7274900000 | -1.1538300000 | -0.7614000000 |
| O | 2.0306700000  | -0.6255300000 | 0.0000000000  |
| H | 1.7274600000  | -1.1538700000 | 0.7614000000  |
| H | 1.7274600000  | -1.1538600000 | -0.7614100000 |

**2b NH<sub>4</sub><sup>-</sup>(H<sub>2</sub>O)<sub>2</sub>**

|   |               |               |               |
|---|---------------|---------------|---------------|
| H | -1.5973600000 | -0.9770400000 | 0.9484200000  |
| H | -2.7849300000 | -0.3494200000 | -0.0889700000 |
| H | -1.1883200000 | 0.2693100000  | -0.1254300000 |
| H | -1.5177800000 | -1.3001700000 | -0.7064800000 |
| N | -1.7795700000 | -0.5836300000 | 0.0021100000  |
| O | 1.8027500000  | -0.7566700000 | 0.0025500000  |
| H | 1.4078100000  | -1.2986200000 | -0.7026400000 |
| H | 1.4290200000  | -1.1638900000 | 0.8036800000  |
| O | 0.1635500000  | 1.5324600000  | -0.1108300000 |
| H | 0.8668200000  | 0.8485500000  | -0.0786600000 |
| H | 0.1113500000  | 1.8503700000  | 0.8016000000  |

**NH<sub>4</sub><sup>-</sup>(H<sub>2</sub>O)<sub>3</sub> isomers:****H<sup>-</sup>(NH<sub>3</sub>)(H<sub>2</sub>O)<sub>3</sub>**

|   |               |               |               |
|---|---------------|---------------|---------------|
| H | 1.9935880000  | 0.0094690000  | 1.0710220000  |
| H | -0.0646310000 | -0.0270580000 | 1.4095780000  |
| H | 2.8350650000  | 0.8546990000  | -0.0015540000 |
| N | 2.8561130000  | -0.0148650000 | 0.5213060000  |
| O | -0.3098430000 | 1.6368280000  | -0.5606280000 |
| H | -0.1054080000 | 0.9108120000  | -1.1649960000 |

|   |               |               |               |
|---|---------------|---------------|---------------|
| H | -0.1791890000 | 1.1593020000  | 0.3036080000  |
| O | -2.5313940000 | -0.2170140000 | 0.5955800000  |
| H | -1.6614430000 | -0.2233720000 | 1.0761580000  |
| H | -2.3805890000 | 0.5378830000  | 0.0121900000  |
| O | 0.0523990000  | -1.4086390000 | -0.7296140000 |
| H | 0.1113120000  | -0.9372080000 | 0.1536520000  |
| H | -0.9034220000 | -1.5353080000 | -0.7801420000 |
| H | 2.6726280000  | -0.7345520000 | -0.1713540000 |

**[NH<sub>4</sub><sup>-</sup>](H<sub>2</sub>O)<sub>3</sub>**

|   |               |               |               |
|---|---------------|---------------|---------------|
| H | -1.0483920000 | 1.5717780000  | -0.7494680000 |
| H | -1.1396210000 | 1.5801330000  | 0.9446180000  |
| N | -1.0094730000 | 2.1858230000  | 0.0987800000  |
| O | 3.7223340000  | -0.1493450000 | -0.3188500000 |
| H | 3.4473500000  | 0.7569170000  | -0.4892040000 |
| H | 2.8857160000  | -0.5773050000 | -0.0629600000 |
| O | 1.1637830000  | -1.2471750000 | 0.4179670000  |
| H | 0.5490050000  | -1.0565500000 | -0.3065450000 |
| H | 0.8113390000  | -0.6851670000 | 1.1246270000  |
| O | -3.6577180000 | -1.2100840000 | -0.2228060000 |
| H | -3.1186370000 | -0.9640220000 | 0.5406200000  |
| H | -3.3036630000 | -0.6234890000 | -0.9041380000 |
| H | -1.7684040000 | 2.9006420000  | 0.0526800000  |
| H | -0.0755770000 | 2.6491310000  | 0.1478240000  |

**3a NH<sub>4</sub><sup>-</sup>(H<sub>2</sub>O)<sub>3</sub>**

|   |               |               |               |
|---|---------------|---------------|---------------|
| H | 0.8329100000  | -1.2581800000 | -0.1379600000 |
| H | -0.0690900000 | -2.6955400000 | -0.3094000000 |
| H | -0.8568200000 | -1.2093700000 | -0.0238400000 |
| H | -0.1263700000 | -1.5181300000 | -1.5084600000 |
| N | -0.0514700000 | -1.6848100000 | -0.4917500000 |
| O | 0.0551900000  | 1.6841800000  | -0.4498500000 |
| H | 0.0625600000  | 2.6573300000  | -0.4153500000 |
| H | -0.1012800000 | 1.4814900000  | -1.3964800000 |
| O | -1.9894200000 | 0.0040700000  | 0.6475800000  |
| H | -2.7281800000 | 0.0655600000  | 0.0228700000  |
| H | -1.4324700000 | 0.7732300000  | 0.4110300000  |
| O | 2.0767700000  | -0.0838400000 | 0.4521900000  |
| H | 2.0793100000  | -0.0405000000 | 1.4184500000  |
| H | 1.5593100000  | 0.7024700000  | 0.1820300000  |

**3b NH<sub>4</sub><sup>-</sup>(H<sub>2</sub>O)<sub>3</sub>**

|   |               |               |               |
|---|---------------|---------------|---------------|
| H | -0.5979500000 | 0.7611100000  | 0.7877500000  |
| H | 0.0501400000  | 0.0530800000  | 2.1921700000  |
| H | -0.2557600000 | -0.8790800000 | 0.8029200000  |
| H | 1.0039300000  | 0.2356000000  | 0.7943100000  |
| N | 0.0539800000  | 0.0451600000  | 1.1707000000  |
| O | 2.4313500000  | 0.4821900000  | -0.3353100000 |

|   |               |               |               |
|---|---------------|---------------|---------------|
| H | 2.5698300000  | -0.4018000000 | -0.7184600000 |
| H | 1.9963300000  | 0.9590100000  | -1.0664400000 |
| O | -0.7727800000 | -2.2229400000 | -0.2923900000 |
| H | -1.6418900000 | -1.9277400000 | -0.6216200000 |
| H | -0.1912000000 | -2.0703900000 | -1.0618600000 |
| O | -1.6342300000 | 1.7511300000  | -0.3264400000 |
| H | -2.3943200000 | 1.1731200000  | -0.5206100000 |
| H | -1.1117900000 | 1.6980100000  | -1.1498500000 |

**3c NH<sub>4</sub><sup>-</sup>(H<sub>2</sub>O)<sub>3</sub>**

|   |               |               |               |
|---|---------------|---------------|---------------|
| H | 0.7635500000  | 1.3651200000  | -0.1725800000 |
| H | -0.2043000000 | 2.0065800000  | -1.4267000000 |
| H | -0.9078000000 | 1.1567300000  | -0.1503800000 |
| H | -0.2663300000 | 2.6929700000  | 0.1095500000  |
| N | -0.1461100000 | 1.8157400000  | -0.4155100000 |
| O | 0.3165600000  | -1.8773400000 | -0.3961200000 |
| H | -0.5229900000 | -1.5051500000 | -0.0631600000 |
| H | 0.2167600000  | -1.8101800000 | -1.3555700000 |
| O | -1.9136100000 | -0.2789600000 | 0.4042600000  |
| H | -2.7421400000 | -0.2497700000 | -0.1124700000 |
| H | -2.1851500000 | -0.0716000000 | 1.3205200000  |
| O | 2.0192600000  | 0.1736800000  | 0.3966700000  |
| H | 1.9740600000  | 0.2054200000  | 1.3616300000  |
| H | 1.5194400000  | -0.6393300000 | 0.1592800000  |

**NH<sub>4</sub><sup>-</sup>(H<sub>2</sub>O)<sub>4</sub> isomers:**

**H<sup>-</sup>(NH<sub>3</sub>)(H<sub>2</sub>O)<sub>4</sub>**

|   |               |               |               |
|---|---------------|---------------|---------------|
| H | -0.4897310000 | 0.5800880000  | -1.5510710000 |
| H | 1.3849140000  | 0.6256070000  | -1.3431630000 |
| H | 2.3603410000  | 1.5763050000  | -0.4668160000 |
| N | 2.3344920000  | 0.6850340000  | -0.9502670000 |
| O | 1.3998430000  | -1.0773940000 | 1.1993630000  |
| H | 1.9230140000  | -0.6170240000 | 0.5169200000  |
| H | 0.6648570000  | -1.4500020000 | 0.6723580000  |
| O | -0.7183810000 | -1.7356780000 | -0.5754980000 |
| H | -0.5573550000 | -0.8719510000 | -1.0652820000 |
| H | -1.5791090000 | -1.5363790000 | -0.1824460000 |
| O | -0.1986520000 | 1.4392200000  | 0.9306160000  |
| H | 0.2932950000  | 0.6707750000  | 1.2651790000  |
| H | -0.2844060000 | 1.2150170000  | -0.0308070000 |
| O | -2.8090240000 | 0.4825050000  | -0.1923250000 |
| H | -2.1176940000 | 0.5573350000  | -0.8903970000 |
| H | -2.3107380000 | 0.8383390000  | 0.5578270000  |
| H | 2.9808710000  | 0.7474260000  | -1.7276820000 |

**[NH<sub>4</sub><sup>-</sup>](H<sub>2</sub>O)<sub>4</sub>**

|   |              |              |              |
|---|--------------|--------------|--------------|
| H | 1.8191220000 | 2.2250390000 | 0.7357750000 |
| H | 3.0173250000 | 3.2472410000 | 0.0599260000 |

|   |               |               |               |
|---|---------------|---------------|---------------|
| N | 2.6562050000  | 2.2692350000  | 0.1128100000  |
| O | -4.1419300000 | 0.6990930000  | 0.0876590000  |
| H | -3.8542450000 | 1.3361540000  | 0.7463830000  |
| H | -3.3009000000 | 0.3169030000  | -0.2315920000 |
| O | -1.6753810000 | -0.3109920000 | -0.8123880000 |
| H | -1.1067820000 | 0.3824260000  | -1.1669060000 |
| H | -1.1024100000 | -0.7517130000 | -0.1502410000 |
| O | 0.0837880000  | -1.4203610000 | 1.0537950000  |
| H | 0.3400990000  | -0.6447900000 | 1.5699120000  |
| H | 0.8912710000  | -1.6035910000 | 0.5318610000  |
| O | 2.4321120000  | -1.6819920000 | -0.5020260000 |
| H | 2.2492380000  | -1.0254570000 | -1.1933070000 |
| H | 3.0891640000  | -1.2142560000 | 0.0387470000  |
| H | 2.3832060000  | 1.9315190000  | -0.8400760000 |
| H | 3.3927690000  | 1.6298880000  | 0.4935310000  |

**4a NH<sub>4</sub><sup>-</sup>(H<sub>2</sub>O)<sub>4</sub>**

|   |               |               |               |
|---|---------------|---------------|---------------|
| H | 0.8453700000  | -0.8593800000 | -1.1480000000 |
| H | 0.0000200000  | 0.5224200000  | -1.5558900000 |
| H | -0.0000100000 | -0.7800600000 | -2.6265800000 |
| H | -0.8453900000 | -0.8593500000 | -1.1479900000 |
| N | 0.0000000000  | -0.5094500000 | -1.6433200000 |
| O | 2.0373300000  | -1.0931100000 | 0.2217300000  |
| H | 2.7548100000  | -0.4579300000 | 0.0863200000  |
| H | 1.4857600000  | -0.6734300000 | 0.9124300000  |
| O | -2.0373600000 | -1.0930500000 | 0.2217000000  |
| H | -1.4857700000 | -0.6733900000 | 0.9124000000  |
| H | -2.7548200000 | -0.4578600000 | 0.0863000000  |
| O | 0.0000400000  | 2.0533100000  | -0.4214700000 |
| H | -0.7762600000 | 2.6377400000  | -0.5390000000 |
| H | 0.7763500000  | 2.6377300000  | -0.5390200000 |
| O | -0.0000100000 | 0.2444300000  | 1.6560700000  |
| H | -0.0001000000 | 0.5931200000  | 2.5581700000  |
| H | 0.0000200000  | 1.0439300000  | 1.0798600000  |

**4b NH<sub>4</sub><sup>-</sup>(H<sub>2</sub>O)<sub>4</sub>**

|   |               |               |               |
|---|---------------|---------------|---------------|
| H | -0.2311900000 | 0.8438600000  | -1.1882500000 |
| H | -1.5523300000 | -0.0008200000 | -0.5581000000 |
| H | -1.2729000000 | -0.0007600000 | -2.2289800000 |
| H | -0.2305000000 | -0.8446000000 | -1.1882100000 |
| N | -0.8282400000 | -0.0006300000 | -1.3115700000 |
| O | 0.9366100000  | 2.0733800000  | -0.5835600000 |
| H | 1.3246100000  | 1.4987400000  | 0.1088000000  |
| H | 0.4247400000  | 2.7161700000  | -0.0699900000 |
| O | 0.9392000000  | -2.0723200000 | -0.5833500000 |
| H | 1.3253100000  | -1.4969100000 | 0.1094600000  |
| H | 0.4284600000  | -2.7164500000 | -0.0703700000 |
| O | -2.5565600000 | -0.0011500000 | 0.8905900000  |

|   |               |               |              |
|---|---------------|---------------|--------------|
| H | -2.2309500000 | -0.7608300000 | 1.4121000000 |
| H | -2.2316600000 | 0.7590300000  | 1.4118500000 |
| O | 1.5592300000  | 0.0008100000  | 1.2446300000 |
| H | 0.7420600000  | 0.0010700000  | 1.7917200000 |
| H | 2.2741300000  | 0.0001600000  | 1.9045000000 |

**4c NH<sub>4</sub><sup>-</sup>(H<sub>2</sub>O)<sub>4</sub>**

|   |               |               |               |
|---|---------------|---------------|---------------|
| H | 0.4478000000  | 0.8702800000  | 1.7807800000  |
| H | -0.3008500000 | 1.6389200000  | 0.4619100000  |
| H | 0.8744400000  | 2.4472100000  | 1.4002800000  |
| H | 1.3254800000  | 1.1688900000  | 0.3723200000  |
| N | 0.5838800000  | 1.5453700000  | 1.0062200000  |
| O | -1.7104400000 | 1.4498100000  | -0.6569700000 |
| H | -1.9229800000 | 0.5056300000  | -0.4649400000 |
| H | -1.3871200000 | 1.4404600000  | -1.5657700000 |
| O | 2.2893100000  | 0.2350700000  | -0.7997600000 |
| H | 1.8399300000  | -0.6193300000 | -0.6277700000 |
| H | 3.1708400000  | 0.1069000000  | -0.4196400000 |
| O | -2.0738900000 | -1.1740100000 | 0.0522400000  |
| H | -1.1650600000 | -1.5334100000 | -0.0050700000 |
| H | -2.2354800000 | -1.1732400000 | 1.0068300000  |
| O | 0.6787700000  | -1.8996400000 | 0.1417600000  |
| H | 0.9673500000  | -2.8224200000 | 0.0184800000  |
| H | 0.8285600000  | -1.7374400000 | 1.1008500000  |

**4d NH<sub>4</sub><sup>-</sup>(H<sub>2</sub>O)<sub>4</sub>**

|   |               |               |               |
|---|---------------|---------------|---------------|
| H | -0.9423200000 | -1.3115200000 | 0.2721700000  |
| H | -0.6032600000 | -0.3885900000 | -1.0418300000 |
| H | 0.6679000000  | -1.2824100000 | -0.3485400000 |
| H | -0.5748800000 | -2.0575900000 | -1.2019200000 |
| N | -0.3507300000 | -1.2780900000 | -0.5760900000 |
| O | 2.3995700000  | -1.1301300000 | -0.0742100000 |
| H | 2.8338100000  | -1.1370600000 | -0.9377400000 |
| H | 2.4220600000  | -0.1804400000 | 0.1935600000  |
| O | 2.1904800000  | 1.5432400000  | 0.5752400000  |
| H | 1.4866400000  | 1.6074600000  | 1.2453200000  |
| H | 1.7497300000  | 1.9191400000  | -0.2090500000 |
| O | -1.8215500000 | 1.1457100000  | -1.0196900000 |
| H | -2.0050500000 | 1.4236600000  | -1.9347200000 |
| H | -1.2067800000 | 1.8323800000  | -0.6834300000 |
| O | -2.3827100000 | -0.5125700000 | 1.2847000000  |
| H | -2.5280500000 | 0.1473900000  | 0.5815600000  |
| H | -1.9310000000 | 0.0042000000  | 1.9689400000  |

**4e NH<sub>4</sub><sup>-</sup>(H<sub>2</sub>O)<sub>4</sub>**

|   |              |               |               |
|---|--------------|---------------|---------------|
| H | 1.1555800000 | -0.5054800000 | -0.9570400000 |
| H | 0.4476000000 | 0.9987900000  | -0.6414900000 |

|   |               |               |               |
|---|---------------|---------------|---------------|
| H | -0.3682500000 | -0.1104800000 | -1.6427900000 |
| H | -0.2180000000 | -0.3901800000 | -0.0081000000 |
| N | 0.2592700000  | -0.0034000000 | -0.8461900000 |
| O | -1.1288000000 | -0.9159700000 | 1.4776700000  |
| H | -0.9638400000 | -0.1508800000 | 2.0670100000  |
| H | -0.5569600000 | -1.6167300000 | 1.8490500000  |
| O | -2.7355800000 | -0.3319500000 | -0.9021400000 |
| H | -2.4630500000 | -0.6807500000 | -0.0365400000 |
| H | -3.0037700000 | 0.5718800000  | -0.6928600000 |
| O | 2.7287900000  | -1.3311200000 | -0.3462000000 |
| H | 2.3793700000  | -2.0412300000 | 0.2206900000  |
| H | 3.0279200000  | -0.6746200000 | 0.3080800000  |
| O | 0.8050500000  | 2.5402700000  | 0.2427200000  |
| H | 1.4055000000  | 2.2121200000  | 0.9389800000  |
| H | -0.0126600000 | 2.7214100000  | 0.7418900000  |
